# Supplementary material for: Evaluation of corrosion inhibition performance of a novel ionic liquid based on synergism between cation and anion
Source: Royal Society of Chemistry journal article supplement (doi:10.1039/d0nj00745e), 2020-01-01
Supplement: d0nj00745e1.pdf [file d0nj00745e1.pdf]

## Electronic Supporting Material

### Evaluation of Corrosion Inhibition Performance of a Novel Ionic Liquid Based on Synergism Between Cation and Anion

Huajing Gao<sup>a</sup>, Ning Xie<sup>a</sup>, Hong Wang<sup>a</sup>, Maolong Chen<sup>b</sup>, Jianlin Zhang<sup>c</sup>, Jian Sun<sup>a\*</sup>, Zhaohui Jin<sup>a</sup>

a. Jilin Institute of Chemical Technology, Institute of Petrochemical Technology, Jilin, 132022, China

b. China Kunlun Contracting & Engineering Corp. Jilin Branch, Jilin, 132022, China

c. Yellow River Delta Jingbo Chemical Research Institute Co. LTD, Shandong, 256500, China

Correspondence to: J. Sun (E-mail: sunjian6225@126.com)

| No. | Contents                                            | Page No. |
|-----|-----------------------------------------------------|----------|
| 1   | Fig. S1. <sup>1</sup> H NMR spectrum of CETSA       | 2        |
| 2   | Fig. S2. IR spectrum of CETSA                       | 3        |
| 3   | Fig. S3. <sup>1</sup> H NMR spectrum of [Bhim]CETSA | 4        |
| 4   | Table S1. The relevant calculation data of $E_a$    | 5        |

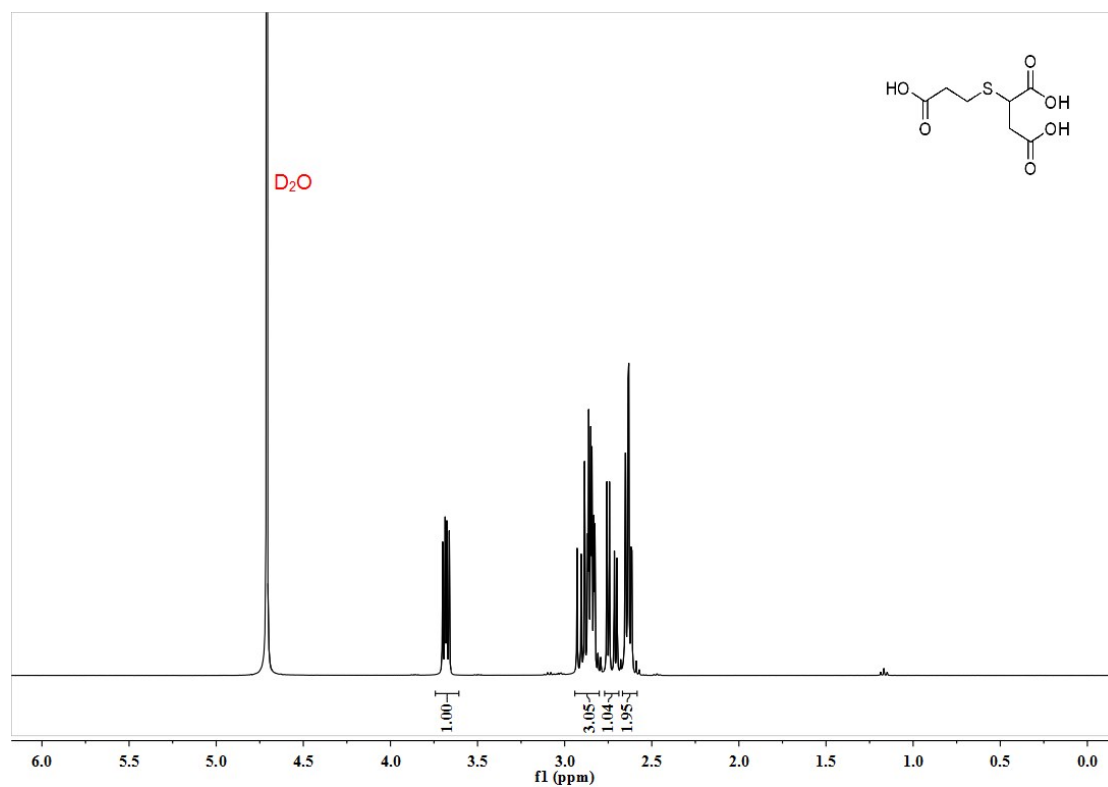

Fig. S1. <sup>1</sup>H NMR spectrum of CETSA

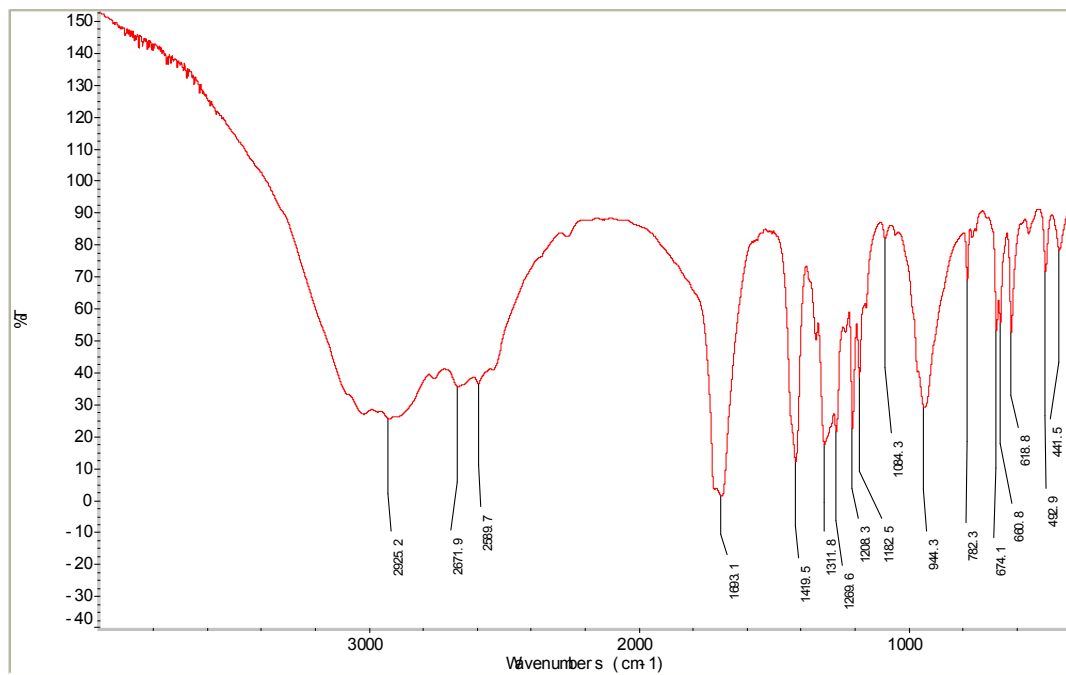

Fig. S2. IR spectrum of CETSA

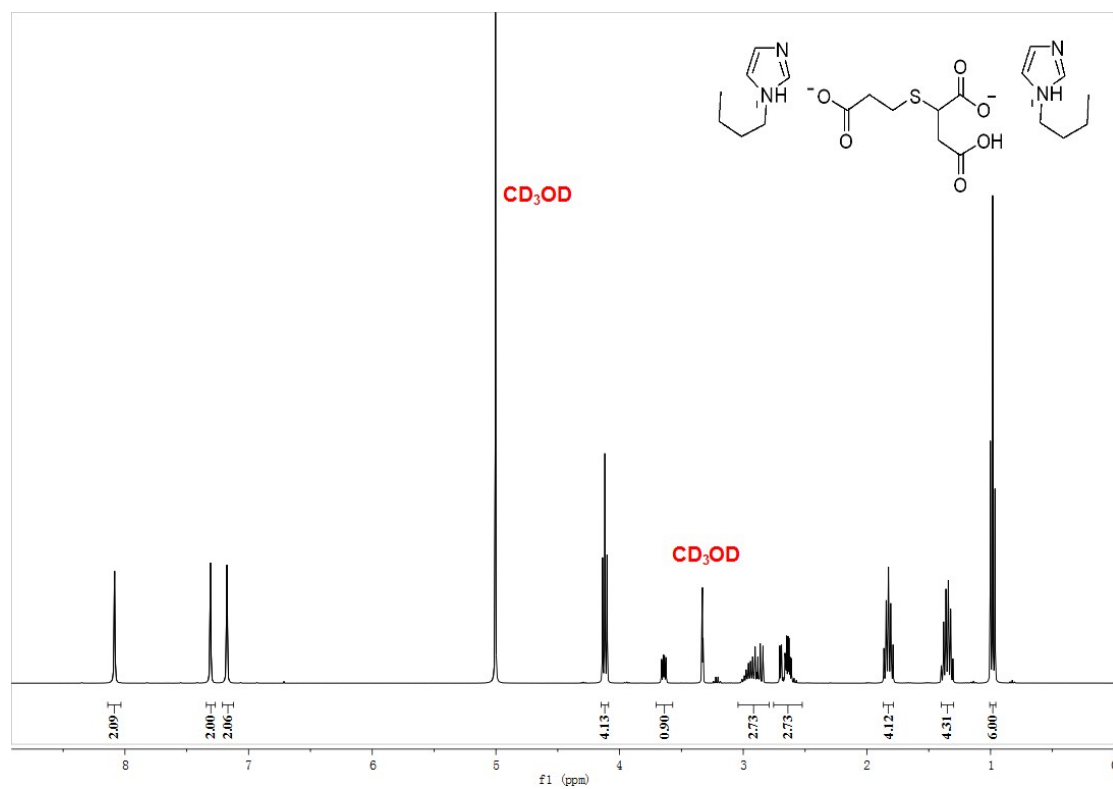

Fig. S3. <sup>1</sup>H NMR spectrum of [Bhim]CETSA

Table S1. The relevant calculation data of  $E_a$ 

| <b>Slope</b> | <b><math>E_a</math> (kJ·mol<sup>-1</sup>)</b> | <b>Intercept</b> | <b><math>A</math></b>    |
|--------------|-----------------------------------------------|------------------|--------------------------|
| -8.9825      | 74.68051                                      | 31.743           | $6.10674 \times 10^{13}$ |
| -11.6698     | 97.02272                                      | 38.9902          | $8.57489 \times 10^{16}$ |
| -11.4005     | 94.78376                                      | 37.8477          | $2.73557 \times 10^{16}$ |
| -12.2607     | 101.9355                                      | 40.4539          | $3.706 \times 10^{17}$   |
| -12.4744     | 103.7122                                      | 41.0429          | $6.6789 \times 10^{17}$  |
